# Supplementary material
Source: publisher site journal article supplement (https://www.dovepress.com/article/533985)
Supplement: Supplementary file 1 [file 533985.pdf]

# COVID-19 Burnout Survey

AAA

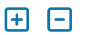

Please complete the survey below.

Thank you!

- Upstate and VA (SYR) PCCM

The survey is fully **CONFIDENTIAL**. No information that could help identify you will be shared. The results of the survey will be published in a de-identified format.

## DEMOGRAPHICS

Your age

Gender

Male

Female

Marital status

Married

Domestic partner

Single

Do you have children?

Yes

No

PGY Level

## PROGRAM QUESTIONS

Very good

Good

About the  
same

Bad

Very bad

How would you rate your fellowship experience during the first outbreak? (March 2020 to June 2020)

Do you feel you had adequate support from your training program during COVID?

Yes

No

How satisfied are you with the communication from training program?

Very Satisfied

Satisfied

Neutral

Dissatisfied

Very Dissatisfied

Were changes in rotations voluntary?

Yes

No

Did you feel that the training program placed you at unnecessary risk of contracting COVID 19?

Yes

No

Did you feel there was adequate support from other residencies/fellowship programs: anesthesia (intubations and lines), surgery (line placement), cardiology (help with critical care), nephrology (placing dialysis catheters) etc.?

Yes

No

What do you feel about the number of hours you worked in a day compared to pre-COVID era?

Same

More

Did you or your pulm/CCM colleagues test positive for COVID-19 from March 2020 to July 2020?

Yes

No

Are you / were you concerned about spreading COVID-19 to your family?

Yes

No

Not at all  
affected

Minimally  
affected

Neutral

Somewhat  
affected

Very much  
affected

How much of a change did you experience in your private life from the pandemic?

How would you describe the changes in your mental status (select all that apply):

no change

angry

sad

anxious

stressed

helpless

exploited

motivated

challenged

Was your education affected by the pandemic?

Yes

No

Did remote learning affect your education?

Yes

No

**Were didactics / conferences frequently cancelled?**

**Yes**

**No**

**In your opinion, the health care system you worked for was:**

**overwhelmed**

**not prepared**

**prepared**

**adequately prepared**

**well prepared**

**Submit**
